# Supplementary material for: The Alterations of Vaginal Microbiome in HPV16 Infection as Identified by Shotgun Metagenomic Sequencing
Source: Front Cell Infect Microbiol. 2020 Jun 23;10:286. doi: 10.3389/fcimb.2020.00286 (PMC7324666; doi:10.3389/fcimb.2020.00286)
Supplement: Supplementary file 6 [file Table_6.XLSX]

## Sheet: Table S6
Table S6. qPCR results of selected species and gene markers in validation cohort.
			mean of CP value
ID	concentration（ng/ul)	Q16S	Atopobium vaginae	Lactobacillus iners	Peptostreptococcus anaerobius	Chlamydia trachomatis	Candida albicans	Q16S	Gardnerella vaginalis
inf-71	78.8	11.24	23.08	11.4367	27.6233	18.78	30.2233	10.8833	35
inf-75	372.3	9.99	15.8933	11.5633	31.3767	29.3033	32.7967	8.04	13.9333
inf-76	323	10.12	22.9167	10.7333	27.8067	30.1533	33.6633	9.81	22.8933
inf-78	235.3	13.4	23.57	24.6067	28.0533	20.9733	30.8833	11.9433	35
inf-81	307.3	11.14	15.38	26.7933	25.1	31.0333	29.5367	11.53	18.6633
inf-84	423.3	8.68	12.36	14.0433	31.2833	30.9933	30.52	8.07333	18.5133
inf-85	315.3	11.16	22.7133	11.6767	30.8333	29.7133	28.6133	9.89333	25.8867
inf-86	78.2	10.88	22.32	13.05	29.1533	29.54	28.5867	9.66667	27.5933
inf-87	275.7	10.04	22.73	10.1833	30.5067	29.8	30.34	10.0867	21.0533
inf-88	166.9	10.11	23.44	10.6567	30.4433	30.2367	31.63	9.72333	28.7033
inf-89	518	12.25	23.3033	13.1067	31.0067	30.88	28.3733	12.9067	16.6667
inf-90	251.8	10.81	22.8567	12.7533	28.62	29.53	32.13	9.93667	31.2933
inf-91	137.8	12.91	19.7033	23.9867	31.1533	30.4967	31.64	12.02	23.8567
inf-92	119.3	9.31	22.9967	20.8133	28.9233	29.1833	26.6833	10.0133	28.2967
inf-93	118.7	10.73	23.0467	11.38	28.7	28.4867	26.8867	9.56667	34.4467
inf-94	346.6	7.74	23.1467	8.96	27.4667	31.1233	30.4433	7.87	27.1167
inf-95	686.9	12.04	23.22	26.3133	29.6767	19.9233	31.0767	12.05	33.4533
inf-96	155.6	7.77	23.11	9.05333	28.4933	30.74	30.8433	6.94333	24.62
inf-97	144	11.22	22.6933	20.4833	29.13	30.18	32.06	10.42	24.1433
inf-98	132.8	11.26	23.2567	14.5233	30.0133	29.5033	31.63	11.1067	30.0133
inf-99	132.7	10.79	23.39	26.3267	29.4033	29.9833	31.3433	10.8333	13.67
inf-100	158.5	10.75	16.62	25.26	29.8733	29.3333	29.9633	11.15	26.6067
inf-101	102	10.85	22.8133	23.8133	27.8033	28.9667	26.4733	10.3833	33.4567
inf-104	266.9	10.09	13.7667	13.7033	23.4467	31.68	28.9	10.3533	16.4933
inf-105	348.1	10.03	23.53	10.04	23.2967	30.8633	28.82	10.1633	33.28
inf-106	184.8	10.33	23.7167	10.59	23.4933	29.96	29.3667	8.27333	32.39
inf-107	353.5	9.75	23.3467	10.5633	23.57	29.83	30.3667	10.6267	30.1467
inf-108	121.5	10.13	24.5467	10.4433	23.2867	31.6433	29.7867	9.72333	33.0467
inf-109	152.5	11.73	23.73	11.84	24.0867	31.1233	29.0733	11.71	27.23
inf-110	218.9	7.97	23.5	9.37667	23.9167	26.8033	19.8233	7.71	31.04
inf-111	105.7	8.92	23.5033	8.76333	23.2967	31.54	28.1133	7.44	32.1333
inf-112	321.2	10.19	23.63	10.6833	23.6233	29.4	27.0667	10.0233	32.0367
inf-113	563.2	9.86	23.4033	16.75	23.4667	30.0367	28.84	10.57	22.8933
inf-114	164.9	8.04	12.2367	15.83	23.3333	29.6133	29.6367	5.80333	17.2533
inf-116	60.5	10.43	24.2567	11.6433	23.5833	29.6767	29.66	10.44	33.3067
inf-117	185	11.34	13.7533	21.69	23.5	30.11	29.0933	11.4967	13.0967
inf-118	55.3	10.45	23.66	13.23	23.27	29.2633	29.1467	9.38	33.69
inf-119	176.9	10.18	23.9033	10.4467	23.4333	30.4133	18.19	9.93667	34.3733
inf-120	257.1	10.01	23.1667	15.2567	23.33	28.16	28.3933	10.1267	27.3267
inf-121	354.9	10.67	23.9133	11.6233	23.76	30.0033	28.5167	10.9033	32.1967
inf-122	290.3	10.67	24.0767	11.0433	23.65	29.55	29.67	10.8267	28.68
inf-123	218.9	10.47	23.5567	16.88	23.4733	30.2667	28.78	11.6133	23.9733
inf-124	105.7	12.47	24.5533	13.6367	24.1033	29.9933	29.0333	12.6267	22.01
inf-125	321.2	11.29	23.5467	20.1233	23.64	29.0367	29.4233	11.8067	34.32
inf-126	563.2	11.8	16.0733	13.3267	24.38	28.76	30.0767	11.57	22.4533
inf-127	164.9	11.63	23.5433	12.7733	23.44	29.8267	28.08	11.2567	29.71
inf-128	61	12.02	23.7267	12.3433	22.61	26.3567	28.75	11.4533	21.0333
inf-129	60.5	9.55	23.6033	10.5667	22.1233	25.48	28.9333	10.06	33.8167
inf-130	185	9.01	23.9433	9.52667	22.13	26.3233	30.0667	7.13	31.44
inf-132	176.9	10.85	24.2667	19.31	22.3967	25.8033	29.73	9.03	28.3
inf-133	257.1	11.66	23.67	17.63	22.2633	25.9167	29.2067	10.5967	27.19
inf-134	354.9	11	23.4333	21.4833	22.16	26.17	28.1067	9.96667	22.04
inf-135	290.3	8.43	24.13	9.30667	22.52	25.7267	29.27	8.46333	30.9767
N-39	78.6	11.32	11.88	21.95	29.1367	29.58	28.29	11.9267	35
N-40	335.6	10.24	26.27	15.96	31.1467	31.2167	35	9.89333	29.2967
N-41	238	11.51	26.0333	21.0433	28.0933	29.8433	27.8333	9.81	33.9167
N-42	87.3	10.68	23.5233	11.72	32.92	31.67	33.4733	11.0567	31.55
N-43	207.7	10.14	27.5733	13.4567	30.2733	30.5367	30.1933	9.67667	29.41
N-44	321.8	12.02	26.5567	15.7367	28.85	28.52	32.2267	13.0267	32.89
N-54	215.5	10.29	25.5133	23.7267	29.5933	31.3067	32.93	9.44	29.7767
N-55	237.1	10.17	26.6033	10.8567	30.2867	32.3367	34.3233	9.81	35
N-56	144.2	12.02	27.3967	19.14	31.23	31.6067	32.6833	11.2767	35
N-57	220.1	10.41	27.49	10.97	29.9233	30.7567	31.2633	10.2033	35
N-58	248.1	10.92	27.0567	11.6267	31.7067	30.2767	32.0433	10.31	28.6733
N-59	219.6	10.07	24.6333	12.84	32.6833	30.91	31.1567	10.4067	34.42
N-60	225.1	10.62	23.27	11.2567	29.7667	30.6867	31.1733	10.0133	34.5867
N-61	101.4	13.49	26.9633	24.6967	29.3533	29.97	32.17	12.9867	18.95
N-62	195.6	9.63	16.7233	10.02	30.4633	30.9833	26.34	9.07	19.4767
N-63	124.8	7.43	26.8367	9.73	25.4733	19.89	32.43	8.19333	28.47
N-64	131.8	10.76	26.7767	24.7	32.5467	31.1467	33.8267	10.7533	17.4333
N-65	166.2	10.49	26.7967	22.58	30.3833	30.07	35	9.74667	33.6067
N-66	192.9	9.82	23.7333	17.1467	31.4833	28.7167	31.3833	10.1367	35
N-67	155.9	10.6	27.11	11.84	31.2267	31.6967	32.42	10.1	33.3867
N-69	193.2	11.89	27.3067	24.0833	30.16	26.6467	30.96	11.5567	14.73
N-70	471.1	11.57	13.2433	24.6433	30.3367	19.3467	26.9133	11.4967	20.53
N-71	427	12.59	26.23	23.9467	29.6667	18.0733	32.48	11.8433	24.0667
N-72	367.2	10.44	26.34	20.9833	30.4633	29.9533	32.5267	10	33.5767
N-73	276.1	10.36	26.73	10.8533	31.1467	30.4633	33.7567	10.41	32.3333
N-74	115.1	8.85	26.86	9.98333	32.0767	31.2933	31.5667	8.05333	34.6267
N-75	45.9	11.06	26.75	11.7567	30.37	29.4833	33.33	10.9433	34.4533
N-76	183.8	10.23	16.1367	22.7833	29.8967	30.43	31.5433	10.3833	16.9
N-77	269	10.27	26.55	11.0167	30.0967	30.8867	31.0333	9.98667	35
N-78	348.1	10.54	27.4567	24.2	27.2767	32.0767	33.42	10.1467	32.8267
N-80	310.4	10.16	27.2767	10.79	28.95	31.1067	33.9733	10.07	26.0967
N-81	140.9	9.83	26.7133	14.9467	28.12	29.7933	32.28	10.24	26.39
N-82	243.9	10.66	28.1933	11.2867	29.5367	30.4467	33.41	9.41333	29.7667
N-83	144.4	11.01	22.5433	11.65	28.47	28.54	32.2467	10.1167	29.1433
N-84	159.4	10.38	26.0833	10.1167	27.07	29.3233	31.2667	8.83	34.5467
N-85	60.9	11.43	27.6733	23.6267	27.9867	30.5967	28.9567	10.7833	33.7267
N-87	226.3	11.49	12.41	23.27	29.1133	31.57	32.7967	11.25	35
N-89	142.7	10.73	26.63	22.78	28.9667	30.27	33.4033	10.1433	20.76
N-91	287	10.61	27.05	21.3967	30.4233	29.96	32.74	9.71	32.1767
N-92	275	10.13	27.24	11.3767	30.7333	26.3467	31.13	10.5667	28.0567
N-93	85.9	10.38	26.73	10.57	27.2067	30.3533	32	9.65667	32.3767
N-94	167.2	11.2	25.26	11.73	27.77	28.23	29.82	12.1067	30.2967
N-95	152.4	10.25	26.1033	22.5667	29.5433	30.3033	31.53	10.7733	27.6433
N-96	302.9	11.19	27.91	11.9267	30.03	30.0867	32.7467	10.8367	34.5167
N-97	101.8	14.2	21.0267	23.1533	29.9	29.5467	32.7067	10.4967	17.2433
		mean of CP value
ID	concentration（ng/ul)	Q16S	GI_0004362	GI_0014455
FY-1	33.8	10.0933	27.42	28.5933
FY-3	86.8	11.0367	18.2533	19.3367
FY-5	373.8	9.28667	23.1	31.8167
FY-6	92.75	9.09	21.73	24.0633
FY-9	105.85	8.42	26.3233	30.4667
FY-10	153.65	6.94	21.5433	24.7467
FY-13	39.9	9.43	21.54	29.29
FY-16	124.6	9.13	29.03	29.2467
FY-17	237.85	7.13667	28.2733	28.6967
FY-18	109.15	7.86667	24.4567	29.2767
FY-19	377	6.01	11.6033	30.7
FY-20	134.5	6.23333	23.94	26.63
FY-22	70.95	9.38	28.4067	27.3233
FY-25	149.4	6.35	23.1967	29.8267
FY-26	45.1	8.38	11.0033	16.23
FY-32	444.55	2.15	18.79	25.0333
FY-33	314.5	8.12	13.62	31.2833
FY-34	423.1	5.86667	23.0967	30.56
FY-35	45	6.74	16.7567	22.39
FY-37	384.4	3.44	32.0367	33.14
FY-39	19.95	9.30333	13.1467	25.7467
FY-43	125.95	6.32667	20.4267	30.0433
FY-45	27.5	13.19	14.5	28.9967
FY-46	37	7.09	12.2567	14.89
FY-48	36.15	12.7967	26.25	30.1267
FY-49	46.2	12.7833	30.72	28.74
FY-57	34.5	10.5633	28.4833	27.5733
FY-64	373.85	7.54	32.1	30.5833
N-5	148.2	10.51	30.3567	29.1
N-6	130.45	10.3333	25.17	30.8033
N-7	205.6	8.46333	24.31	28.2467
N-8	278.2	9.33333	34.2933	24.44
N-9	423.7	11.6267	33.7967	25.3167
N-10	44.4	12.84	28.3833	27.7833
N-11	317.4	9.03	19.3667	26.86
N-12	152.9	7.72	22.7333	27.6433
N-13	65.5	11.6533	28.9767	26.73
N-14	235.6	9.55667	23.44	25.96
N-15	140.55	10.9033	13.98	28.6533
N-16	147.15	9.76	30.46	27.75
N-17	87.55	7.76667	10.8267	17.8867
N-18	305.05	9.88	15.0267	29.9833
N-19	104.55	12.1333	28.54	27.7233
N-20	354.6	6.53333	25.0867	27.5767
N-21	167.2	11.1167	11.69	28.9267
N-22	102.3	9.95	14.5267	24.8767
N-23	168.5	7.43667	14.4967	28.44
N-24	113.7	13.23	20.2033	28.41
N-25	359.2	8.63	27.9833	31.98
N-26	179.1	9.06333	32.7967	30.8067
N-27	145.4	8.40667	23.8267	29.5733
N-28	146.5	9.83667	31.13	30.33
N-29	137	9.73	24.2633	27.5067
N-30	225.5	8.71667	31.0967	30.8767
N-31	103.8	9.28	30.16	29.0267
N-32	147.8	5.89333	16.5833	24.9533
N-33	52.2	9.55333	13.7567	28.1033
N-34	100.3	9.51667	28.0767	28.7133
N-35	115.7	9.61	16.99	19.46
N-36	311	10.2433	31.3767	29.4667
N-37	87.3	10.82	18.47	28.8433
N-38	102.8	7.39	12.9567	35
N-39	78.6	11.32	31.4667	31.3467
N-40	335.6	10.24	30.46	31.4233
N-41	238	11.51	31.2133	31.1833
N-42	87.3	10.68	30.22	29.92
N-43	207.7	10.14	26.3467	31.4767
N-44	321.8	12.02	31.65	30.0533
N-45	68.45	8.31	11.5667	31.5667
N-54	215.5	10.29	27.5667	28.3733
N-55	237.1	10.17	31.4367	35
N-56	144.2	12.02	35	35
N-57	220.1	10.41	32.4067	31.28
N-58	248.1	10.92	29.9833	29.8167
N-59	219.6	10.07	26.7133	31.5233
N-60	225.1	10.62	27.77	28.8833
N-61	101.4	13.49	22.49	35
N-62	195.6	9.63	17.74	33.4667
N-63	124.8	7.43	20.49	26.88
N-64	131.8	10.76	13.4767	32.7367
N-65	166.2	10.49	30.29	33.52
N-66	192.9	9.82	32.1467	30.6567
N-67	155.9	10.6	30.9133	30.32
N-68	86.3	11.01	14.3933	29.2033
N-69	193.2	11.89	17.0367	29.1967
N-70	471.1	11.57	18.2	34.35
N-71	427	12.59	25.9633	30.6933
N-72	367.2	10.44	32.2033	31.79
N-73	276.1	10.36	31.1767	29.9767
N-74	115.1	8.85	24.9033	30.2167
N-75	45.9	11.06	19.73	31.2467
N-76	183.8	10.23	14.27	30.82
N-77	269	10.27	31.1	28.7267
N-78	348.1	10.54	33.65	34.22
N-79	346.1	13.02	16.5533	31.53
N-80	310.4	10.16	21.3067	30.9267
N-81	140.9	9.83	22.1367	30.8033
N-82	243.9	10.66	30.83	32.01
N-83	144.4	11.01	30.83	32.0667
N-84	159.4	10.38	23.3467	31.6233
N-85	60.9	11.43	30.27	30.82
N-86	83.8	10.41	11.5967	28.0367
N-87	226.3	11.49	25.2	34.4967
N-88	143.9	8.73	15.69	20.9333
N-89	142.7	10.73	16.7867	31.68
N-90	89.2	12.88	20.0567	32.5433
N-91	287	10.61	27.67	31.4433
N-92	275	10.13	25.41	30.6267
N-93	85.9	10.38	22.75	26.12
N-94	167.2	11.2	25.2133	27.21
N-95	152.4	10.25	24.86	32.5267
N-96	302.9	11.19	28.64	33.3133
N-97	101.8	14.2	24.9433	31.8467
inf-8	334.5	8.88667	24.3567	29.45
inf-9	136.75	8.37667	9.54333	27.3633
inf-10	185.8	11.1133	24.7	22.7
inf-11	190.3	8.56333	13.93	28.47
inf-21	107.95	8.80333	14.39	26.49
inf-22	198.8	9.26667	21.7667	28.52
inf-23	90.1	8.57667	26.9467	27.9833
inf-24	173.2	4.30333	28.82	33.5533
inf-25	47.25	10.25	24.0367	27.7067
inf-26	210	9.65333	14.5333	29
inf-28	142.95	9.56	19.0333	29.33
inf-34	571.65	7.57	25.2333	30.2133
inf-36	164.75	8.05667	24.3833	24.84
inf-27	175.55	6.65667	27.89	27.6067
inf-29	60.95	9.33	27.7433	25.61
inf-30	368.15	8.6	23.72	26.1
inf-31	150.4	5.96333	11.45	29.85
inf-32	125.2	7.24667	16.7533	24.97
inf-33	289.45	7.31333	27.4833	23.6433
inf-37	46.95	11.6567	27.33	29.13
inf-38	156.05	9.25667	26.6733	26.3167
inf-39	144.55	9.86333	21.8933	24.44
inf-40	172.3	7.56333	24.0367	19.8967
inf-41	190	9.58333	18.5033	28.6833
inf-42	234.85	5.73333	24.5867	27.18
inf-45	299.85	2.83	11.0667	17.29
inf-46	312.9	2.67	12.76	31.7933
inf-47	197.1	3.30667	13.37	15.5767
inf-48	76.35	8.03	17.0333	17.2733
inf-49	69.3	10.3267	10.95	27.5067
inf-50	139.85	3.97667	17.47	16.2867
inf-2	119.2	9.77	15.6833	26.8033
inf-5	201.6	9.62	25.76	29.6533
inf-6	253.7	8.73333	26.9	24.8633
inf-7	288.2	7.79667	27.6867	30.15
inf-12	46.4	11.38	20.6467	26.95
inf-13	214.9	9.08667	31.5833	29.2367
inf-14	148.65	11.0433	16.44	23.95
inf-15	175.8	7.54333	26.1867	21.2667
inf-16	144.7	9.89333	14.1867	28.68
inf-17	73.45	8.69333	31.1733	28.3833
inf-18	545.75	8	23.98	30.1367
inf-19	188.35	9.95	30.6867	27.74
inf-20	157.05	9.67	28.7567	26.1833
inf-51	315.75	11.161	30.01	28.9267
inf-52	249.15	8.23333	14.69	32.0367
inf-53	162.25	9.47667	26.5433	30.6067
inf-54	168.5	10.2867	25.1233	28.53
inf-55	149.85	9.96	13.1633	28.1267
inf-56	157.5	9.42	28.2833	30.2467
inf-57	171.95	8.63	20.5867	25.39
inf-58	66.85	8.23	30.0133	29.7567
inf-59	306.7	8.91	32.91	28.5567
inf-60	196	9.52667	25.17	25.6667
inf-61	286.3	9.06667	12.1167	29.51
inf-62	332.5	9.19667	13.1967	26.34
inf-63	134	8.46333	14.8367	21.6833
inf-64	125.4	9.40333	29.0533	23.86
inf-65	183.1	10.2367	14.1433	25.8233
inf-66	66.5	12.3067	29.7067	22.62
inf-67	83.4	9.45	24.6533	20.8967
inf-71	78.8	11.24	29.35	34.57
inf-75	372.3	9.99	18.52	32.6267
inf-76	323	10.12	21.18	27.8467
inf-78	235.3	13.4	33.4167	32.8533
inf-81	307.3	11.14	18.03	24.0967
inf-84	423.3	8.68	15.1033	17.11
inf-85	315.3	11.16	27.4333	29.8067
inf-86	78.2	10.88	25.9633	32.4733
inf-87	275.7	10.04	17.2	26.6033
inf-88	166.9	10.11	25.8967	30.94
inf-89	518	12.25	14.8333	31.3933
inf-90	251.8	10.81	31.7967	31.3767
inf-91	137.8	12.91	31.4367	29.96
inf-92	119.3	9.31	24.1367	30.76
inf-93	118.7	10.73	32.7	32.56
inf-94	346.6	7.74	26	35
inf-95	686.9	12.04	16.8533	31.0233
inf-96	155.6	7.77	23.4733	32.1533
inf-97	144	11.22	26.74	28.4367
inf-98	132.8	11.26	23.2433	31.44
inf-99	132.7	10.79	12.7533	32.53
inf-100	158.5	10.75	27.18	31.9567
inf-101	102	10.85	30.8967	29.88
inf-102	92.3	13.25	33.4767	31.54
inf-104	266.9	10.09	12.7567	24.64
inf-105	348.1	10.03	32.1367	29.1167
inf-106	184.8	10.33	29.8167	34.03
inf-107	353.5	9.75	21	30.86
inf-108	121.5	10.13	32.8867	31.3567
inf-109	152.5	11.73	24.6667	31.52
inf-110	218.9	7.97	26.15	29.69
inf-111	105.7	8.92	30.66	25.5667
inf-112	321.2	10.19	31.1967	33.9267
inf-113	563.2	9.86	20.29	28.6967
inf-114	164.9	8.04	17.5433	24.4033
inf-115	61	12.55	13.47	21.8133
inf-116	60.5	10.43	29.7	29.8967
inf-117	185	11.34	16.0833	31.38
inf-118	55.3	10.45	22.1033	31.15
inf-119	176.9	10.18	30.36	31.4433
inf-120	257.1	10.01	25.38	28.7
inf-121	354.9	10.67	31.37	33.09
inf-122	290.3	10.67	27.9933	32.18
inf-123	218.9	10.47	25.3167	29.7433
inf-124	105.7	12.47	21.4	28.7767
inf-125	321.2	11.29	31.92	35
inf-126	563.2	11.8	15.56	32.1533
inf-127	164.9	11.63	28.0567	31.38
inf-128	61	12.02	17.1167	35
inf-129	60.5	9.55	27.32	31.1767
inf-130	185	9.01	29.7833	31.66
inf-131	55.3	15.22	16.6267	32.5267
inf-132	176.9	10.85	24.65	30.4133
inf-133	257.1	11.66	21.8867	32.1367
inf-134	354.9	11	25.3167	29.6133
inf-135	290.3	8.43	27.7867	29.59
